# Supplementary material for: NG2 antigen is involved in leukemia invasiveness and central nervous system infiltration in MLL-rearranged infant B-ALL
Source: PubMed Central journal article supplement (PMC5843903; doi:10.1038/leu.2017.294), 2017-10-17

**A**

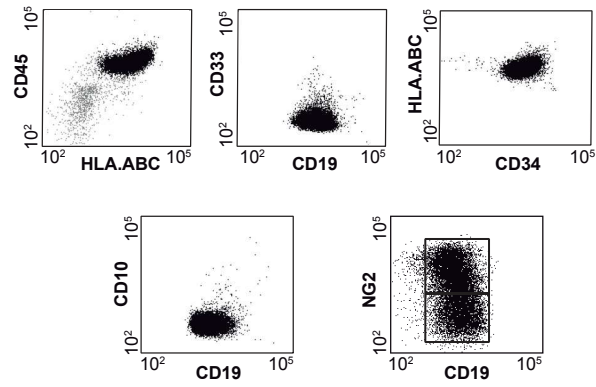

**B**

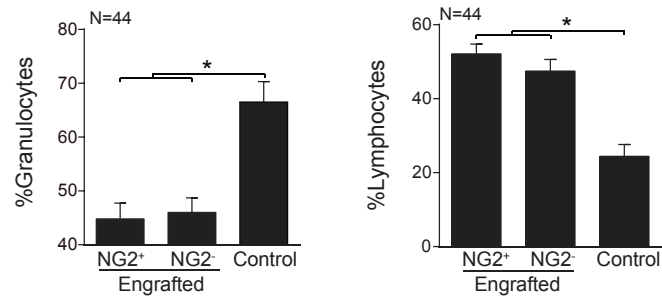

Supplement: leu2017294x2.pdf [file leu2017294x2.pdf]
