# Supplementary material for: NG2 antigen is involved in leukemia invasiveness and central nervous system infiltration in MLL-rearranged infant B-ALL
Source: PubMed Central journal article supplement (PMC5843903; doi:10.1038/leu.2017.294), 2017-10-17

**A**

|                                        |          |            |            |
|----------------------------------------|----------|------------|------------|
| Num. of patients with CNS infiltration | Positive | 1<br>(9%)  | 6<br>(55%) |
|                                        | Negative | 2<br>(18%) | 2<br>(18%) |
|                                        |          | Negative   | Positive   |

Num. of leukemias infiltrating CNS in mice

**B**

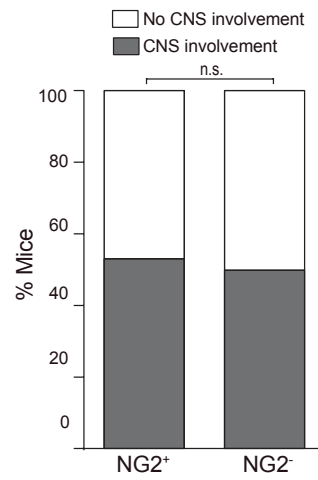

Supplement: leu2017294x3.pdf [file leu2017294x3.pdf]
